# Supplementary material for: P2TF: a comprehensive resource for analysis of prokaryotic transcription factors
Source: PubMed Central journal article supplement (PMC3532121; doi:10.1186/1471-2164-13-628), 2012-11-15

Category

Conserved Domain Architecture

TR

DNA-binding

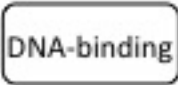

OCS

Input

DNA-binding



RR

REC

DNA-binding



SF

Region X

Region Y



ODP

DNA-binding



Supplement: 1471-2164-13-628-S2.pdf [file 1471-2164-13-628-S2.pdf]
